# Supplementary material for: Molecular Regulation and Evolution of Redox Homeostasis in Photosynthetic Machinery
Source: MDPI journal article supplement (doi:10.3390/antiox11112085), 2022-10-22
Supplement: s1 [file s1]

## Supplementary Table

Table S1. ROS, half-life, migration distance, their production sites and known functions in Plants

| Reactive oxygen species | Half-life   | Migration distance | Production sites and known actions                                                                                                                                           |
|-------------------------|-------------|--------------------|------------------------------------------------------------------------------------------------------------------------------------------------------------------------------|
| $O_2^{\cdot-}$          | 1-4 $\mu$ s | 30 nm              | <p><b>Sites:</b> Apoplast, chloroplast, mitochondria, nuclei, peroxisomes, ETC</p> <p><b>Actions:</b> Dismutation occur to <math>H_2O_2</math>, react with Fe-S proteins</p> |
| $^1O_2$                 | 1-4 $\mu$ s | 30 nm              | <p><b>Sites:</b> Chloroplast, nuclei, membranes</p> <p><b>Actions:</b> Cause oxidation of lipids, proteins and DNA and Met/Cys residues</p>                                  |
| $H_2O_2$                | >1 ms       | >1 $\mu$ m         | <p><b>Sites:</b> Apoplast, chloroplast, mitochondria, peroxisomes, cytosol</p> <p><b>Actions:</b> react with Met and Cys residues and DNA</p>                                |
| $\cdot OH$              | 1 ns        | 1 nm               | <p><b>Sites:</b> Fenton reaction</p> <p><b>Actions:</b> Highly reactive with DNA, RNA, protein and lipids biomolecules</p>                                                   |

## Supplementary Figures

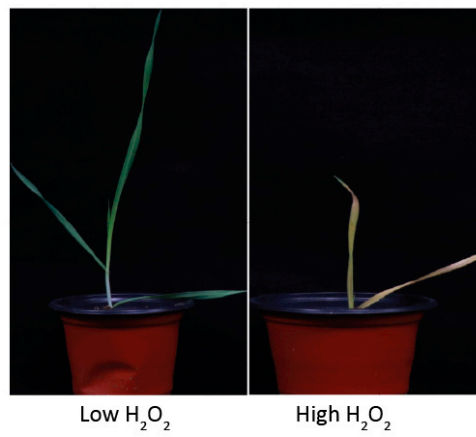

Figure S1. Barley plant growth under low and high H<sub>2</sub>O<sub>2</sub>

**Glyceraldehyde-3-phosphate dehydrogenase**

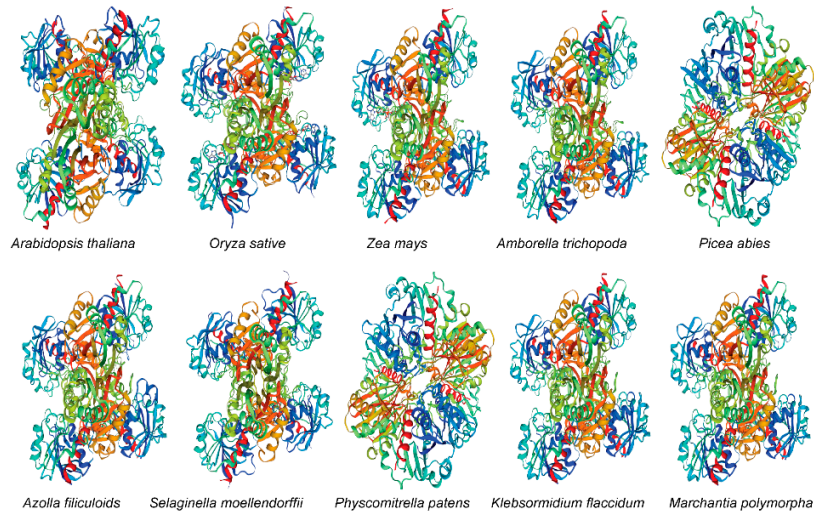

**Trx-like 2.2**

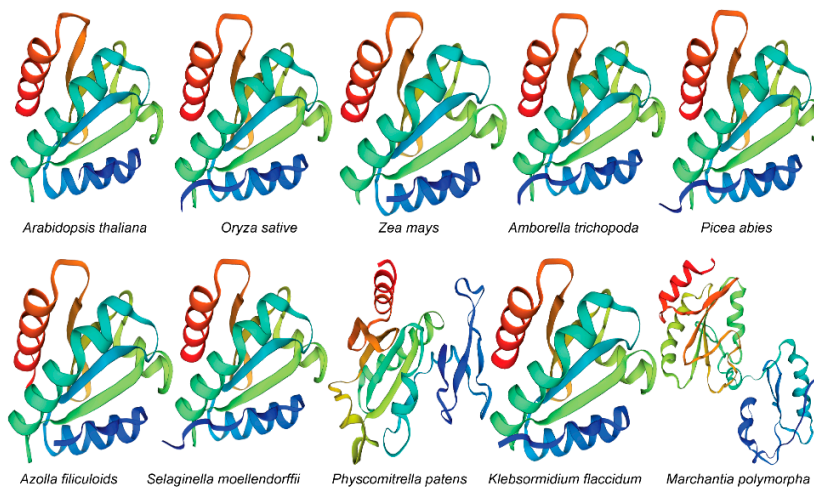

Figure S2. Three-dimensional (3D) protein structures of GAPDH and TrxL2.2 in representative alga and plant species.

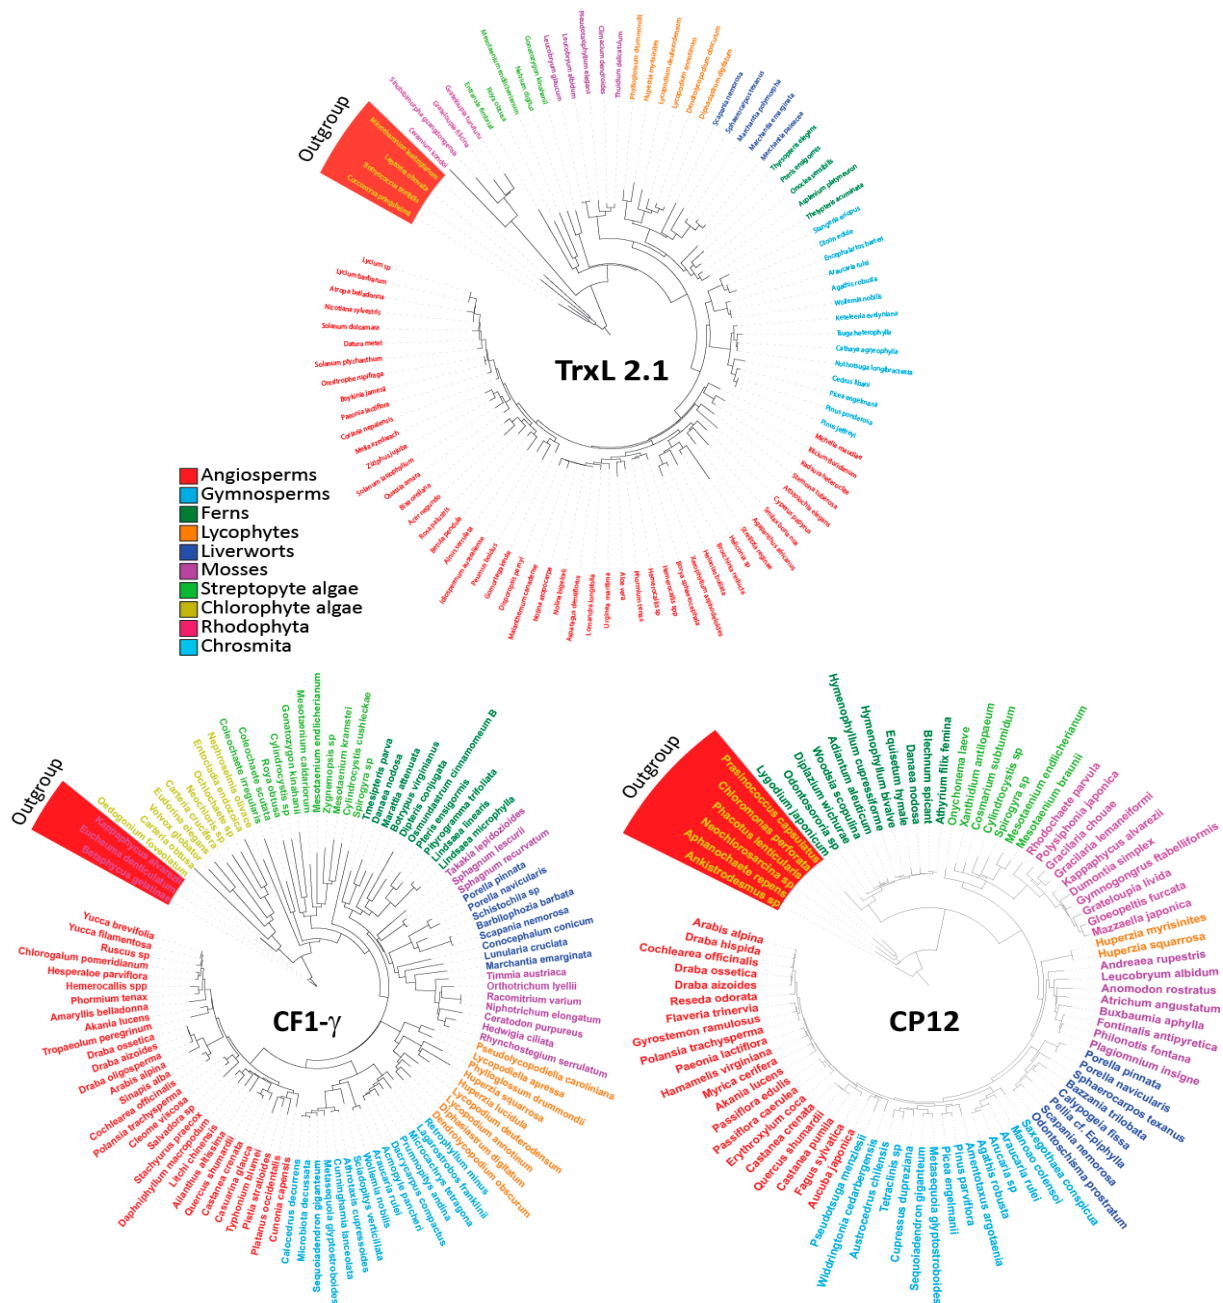

Figure S3. Phylogenies of redox related genes in plants and algae.

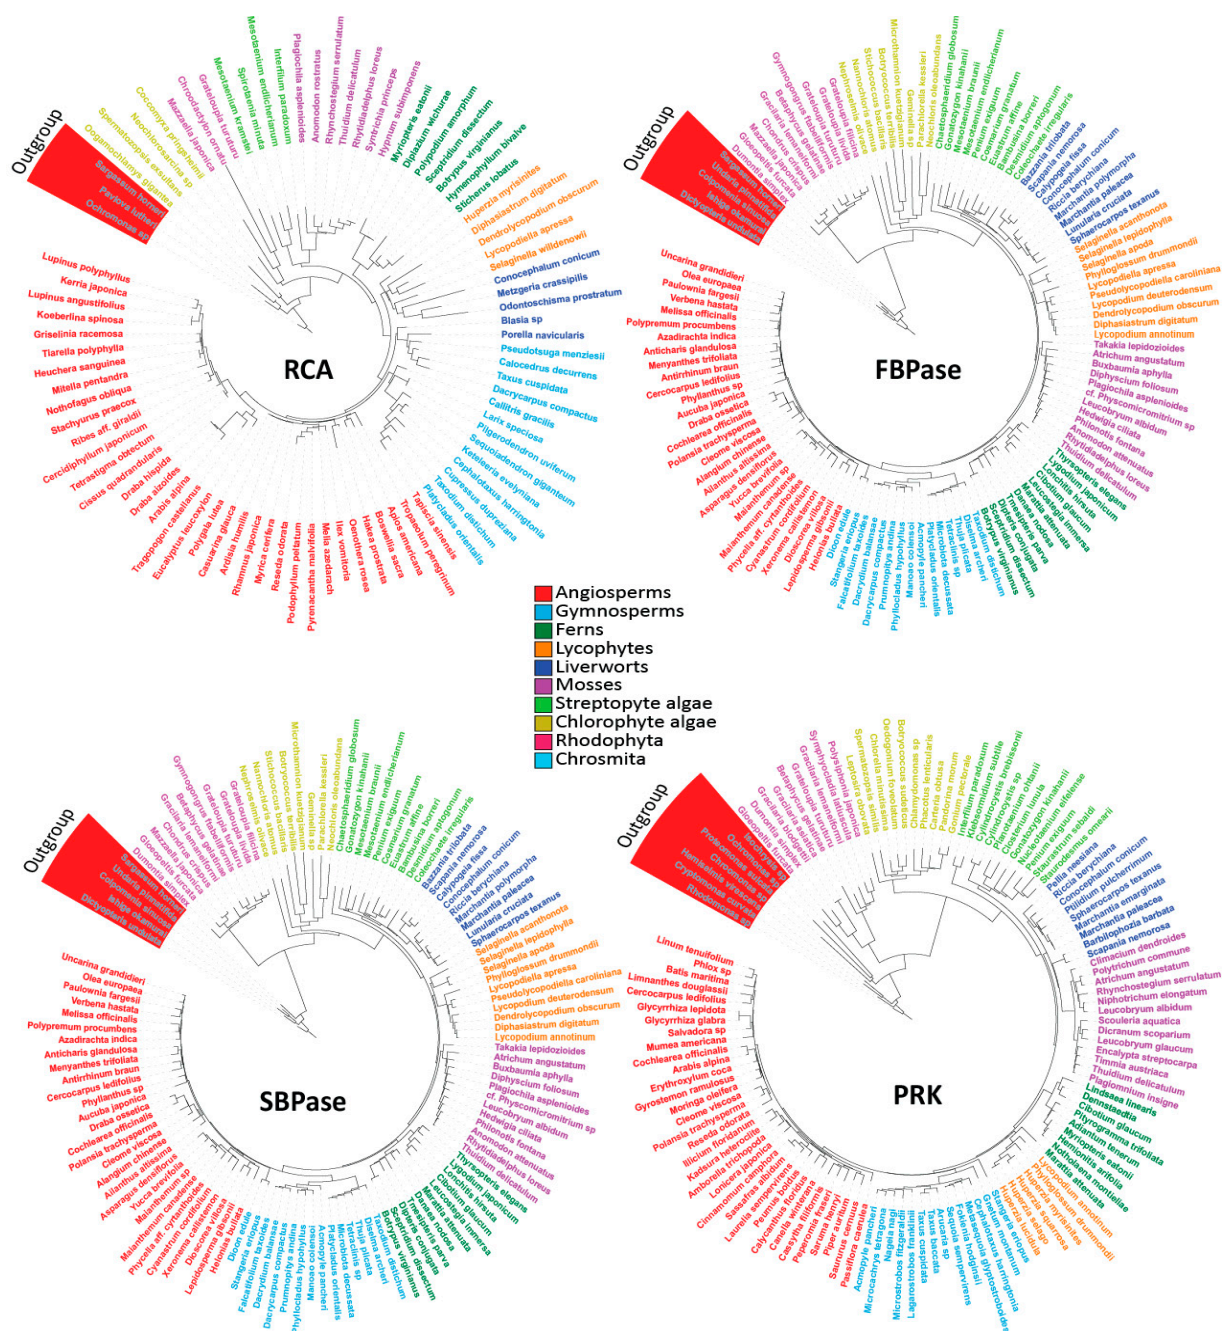

Figure S4. Phylogenies of photosynthesis related genes in plants and algae.



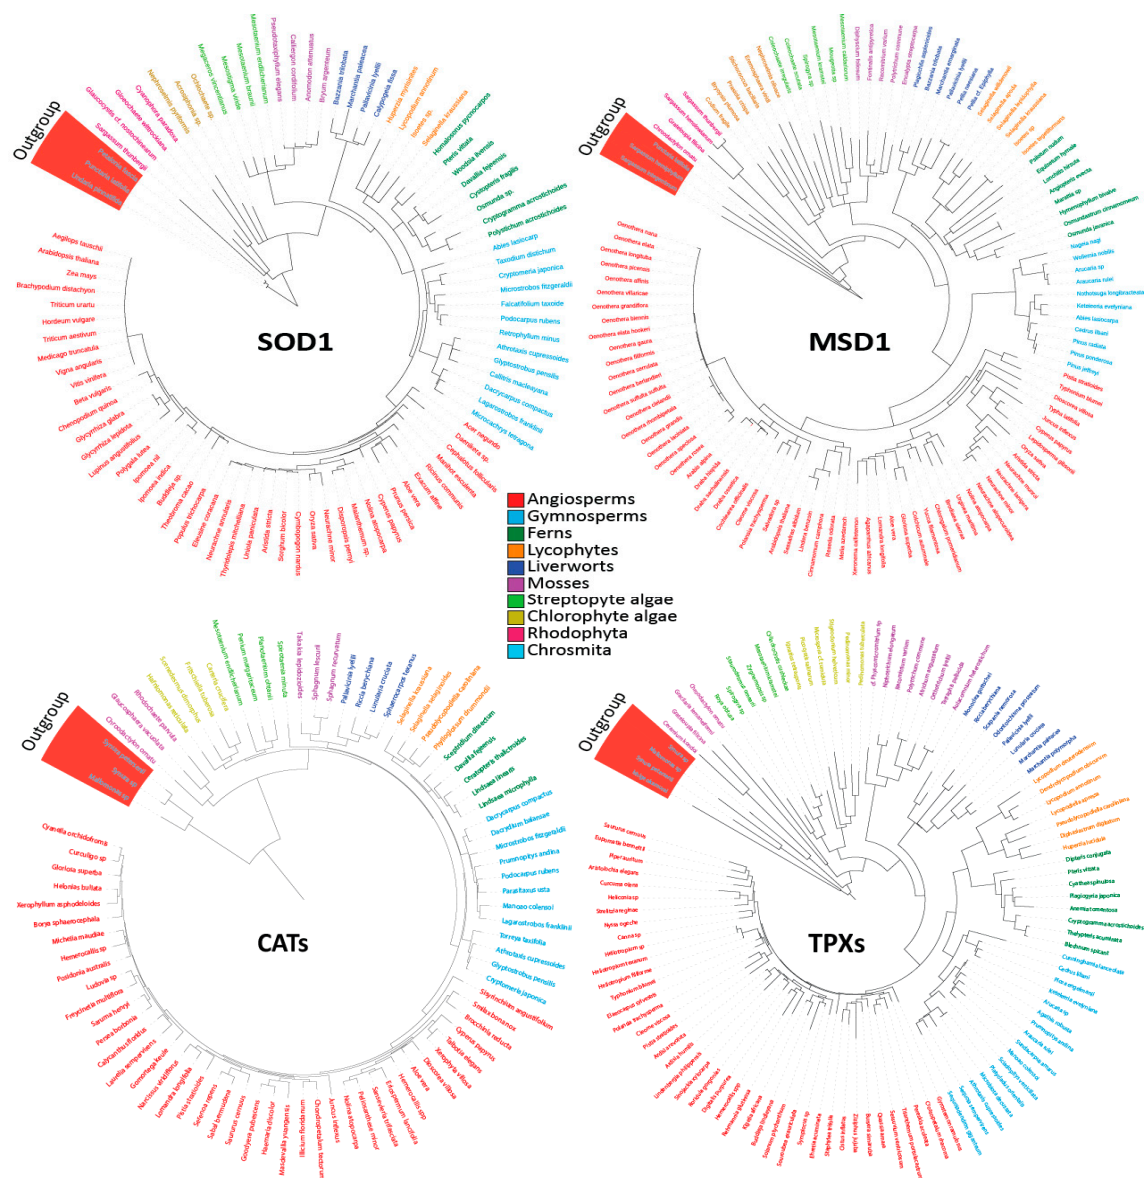

Figure S5 (A). Phylogenies of antioxidant related genes in plants and algae.

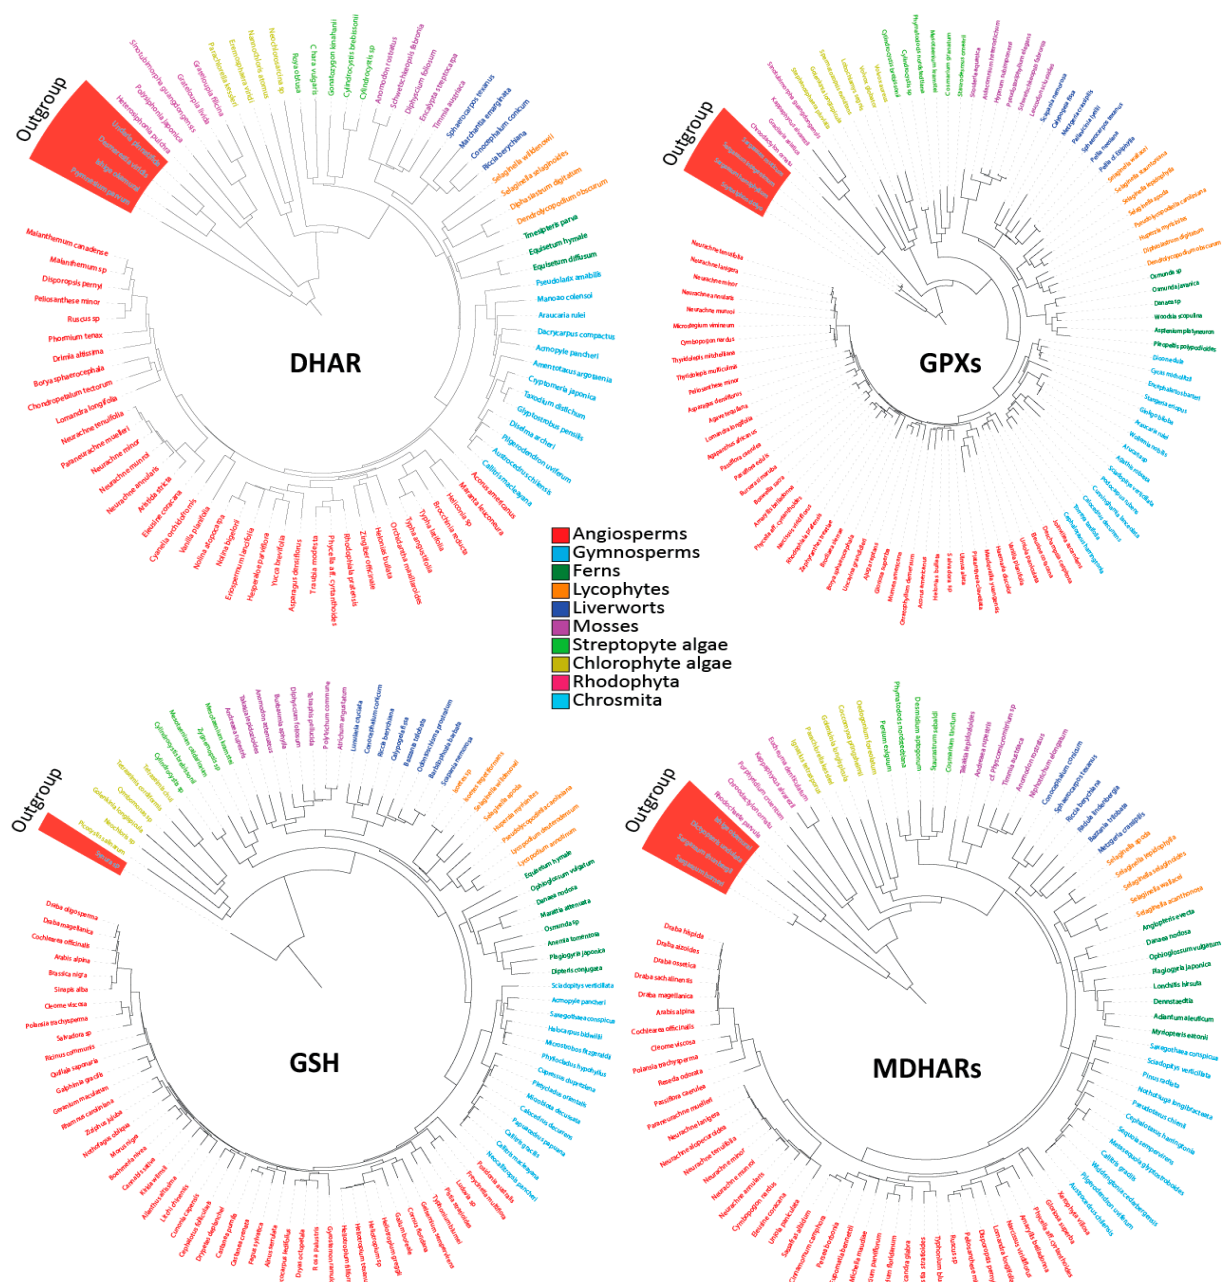

Figure S5 (B). Phylogenies of antioxidant related genes in plants and algae.

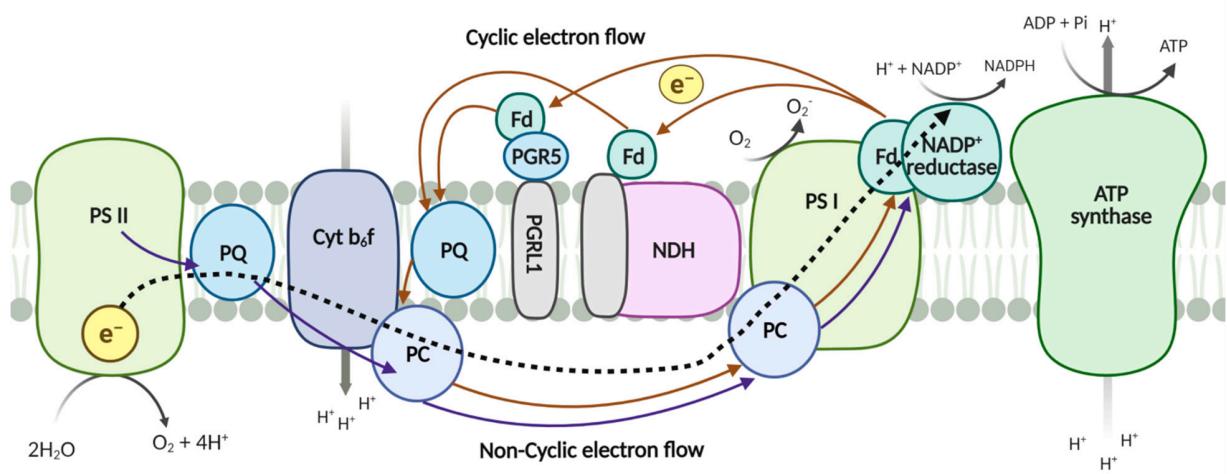

Figure S6. Schematic representation of cyclic and non-cyclic electron flow.
